# Supplementary material for: Green light powered molecular state motor enabling eight-shaped unidirectional rotation
Source: PubMed Central journal article supplement (PMC6773862; doi:10.1038/s41467-019-12463-4), 2019-10-01
Supplement: 41467_2019_12463_MOESM2_ESM.pdf [file 41467_2019_12463_MOESM2_ESM.pdf]

## **Description of Additional Supplementary Files**

File Name: Supplementary Movie 1

Description: First of four possibilities for the trajectory of the unidirectional 8-shaped motion of molecular motor 1.

File Name: Supplementary Movie 2

Description: Second of four possibilities for the trajectory of the unidirectional 8-shaped motion of molecular motor 1.

File Name: Supplementary Movie 3

Description: Third of four possibilities for the trajectory of the unidirectional 8-shaped motion of molecular motor 1.

File Name: Supplementary Movie 4

Description: Fourth of four possibilities for the trajectory of the unidirectional 8-shaped motion of molecular motor 1.
